# Supplementary material
Source: publisher figshare collection journal article supplement (https://sage.figshare.com/ndownloader/files/14072852)
Supplement: Supplementary file 1 [file 14072852]

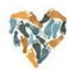

NATIONAL PEDIATRIC CARDIOLOGY  
*Quality Improvement Collaborative*

## INTERSTAGE CHANGE PACKAGE

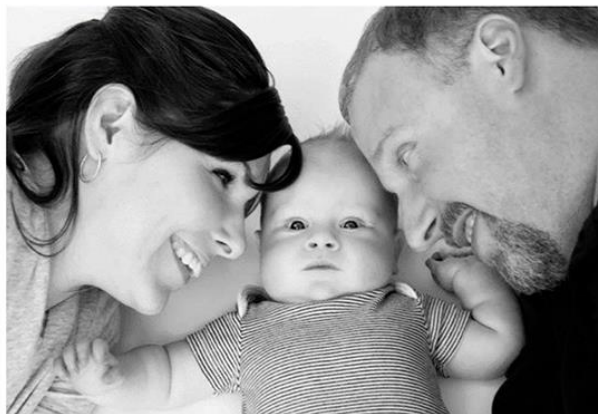

### NPC QIC Care Transition Bundle<sup>#</sup> (discharge preparation activities)

| Care Transition Bundle Elements                                                                                                                                 | Suggested Resources                                                                                                                                 |
|-----------------------------------------------------------------------------------------------------------------------------------------------------------------|-----------------------------------------------------------------------------------------------------------------------------------------------------|
| 1. Assign Discharge Coordinator                                                                                                                                 | Trained and dedicated personnel                                                                                                                     |
| 2. Use standardized checklist format to confirm completion of Care Transition Bundle activities                                                                 | Discharge checklist<br>Journey Board                                                                                                                |
| 3. Evaluate family's ability to obtain medications and refer for additional resources as needed                                                                 | Trained and dedicated personnel                                                                                                                     |
| 4. Provide written materials for post-discharge care that are culturally and language appropriate                                                               | Medication list<br>Nutrition plan<br>Red Flag Action Plan<br>Home Monitoring Plan<br>Preventive Plan/Immunization list<br>Interstage Emergency Card |
| 5. Offer training in Infant CPR and provide a hard copy of CPR instructions                                                                                     | CPR instructions                                                                                                                                    |
| 6. Facilitate home scales and oxygen saturation monitors; assure caregiver is competent in use                                                                  | Home Monitoring Plan<br>Use "Teach Back" methodology                                                                                                |
| 7. Provide parents and baby rooming in at least 24 hours e.g. simulating home environment, with independent feeding and care for baby                           | Rooming In Key Driver Diagram<br>Rooming In Checklist<br>Use "Teach Back" methodology                                                               |
| 8. Use teach- or demonstrate-back or other confirmation methods to assure family competency of key care elements                                                | Use "Teach Back" methodology                                                                                                                        |
| 9. Schedule appointments convenient to family with PCP, HH, Cardiology Clinic et al.                                                                            | Trained and dedicated personnel                                                                                                                     |
| 10. Set at least one follow up contact or appointment with a health care provider within 72 h after discharge                                                   | Trained and dedicated personnel                                                                                                                     |
| 11. Schedule conference call with all post-acute caregivers e.g. parents, PCP, HH, Cardiologist, parents to communicate patient status and Home Monitoring Plan | Conference call agenda and script                                                                                                                   |

<sup>#</sup> Organized chronologically and based upon NPC QICs Key Driver Diagram, input from families of post-Norwood infants, and "Reducing Readmissions Key Design Elements to Consider from a Physician Group Perspective" from the California Quality Collaborative.
